# Supplementary material for: Unprecedented redox-driven ligand ejection in nickel(ii)–diiminosemiquinonate radical complexes
Source: Royal Society of Chemistry journal article supplement (doi:10.1039/c3cc48549h), 2013-12-19
Supplement: c3cc48549h.pdf [file c3cc48549h.pdf]

Electronic supplementary information for:

**Redox-driven ligand ejection in nickel(II)-  
diiminosemiquinonate radical complexes**

Nicolas Leconte, Jérémie Ciccione, Gisèle Gellon, Christian Philouze, Fabrice Thomas

## General

**Materials and methods:** All operations were performed under anaerobic conditions under a pure argon atmosphere using standard Schlenk techniques. Anhydrous toluene and triethylamine were distilled over  $\text{CaH}_2$  under an argon atmosphere prior to use. Anhydrous dichloromethane, acetonitrile, methanol were purchased from Acros. High-pressure reactions were carried out using a 0.6 L Parr Instrument stainless steel vessel. 3,5-Di-*tert*-butyl-2-nitrobromobenzene **3** was prepared according to a reported procedure.<sup>1</sup> All other chemicals were purchased from Acros, Alfa-Aesar, Sigma-Aldrich or TCI and were used as received. NMR spectra were recorded on a Bruker Avance 400 ( $^1\text{H}$  at 400 MHz,  $^{13}\text{C}$  at 100 MHz). Chemical shifts are given relative to solvent residual peaks. Mass spectra were recorded on a Bruker Esquire 3000 (ESI/Ion Trap) equipment. Melting points were measured with a Büchi B-545 apparatus and weren't corrected. Microanalyses were performed by the Service Central d'Analyse du CNRS (Lyon, France). Infrared spectra were recorded on a Thermo Scientific Nicolet iS10 FT-IR spectrometer equipped with an ATR sampling accessory. UV/Vis visible spectra at 298K were recorded on a Varian Cary 50 spectrometer. X-band EPR spectra were recorded on an EMX plus spectrometer equipped with an Oxford Helium cryostat. Spectra were treated using the Bruker SIMFONIA software. Cyclic voltammetry curves were recorded on a CH Instruments 620 potentiostat in a standard three-electrode cell under argon atmosphere in  $\text{CH}_2\text{Cl}_2$  solutions containing 0.1M tetrabutylammonium perchlorate (TBAP) as supporting electrolyte. An  $\text{Ag}/\text{AgNO}_3$  (0.01 M) reference electrode was used. All the potentials given in the text are referred to the regular  $\text{Fc}^+/\text{Fc}$  redox couple used as an internal reference. A glassy carbon disc electrode (5 mm diameter), polished with 1  $\mu\text{m}$  diamond paste, was used as the working electrode. Electrochemical oxidations were performed on an EG&G PAR 273A potentiostat, under an argon atmosphere at 298 K, using a carbon felt working electrode.

**Crystal structure analysis:** Crystals were mounted on a Kappa CCD Nonius diffractometer equipped with graphite-monochromated Mo-K $\alpha$  radiation ( $\lambda = 0.71073 \text{ \AA}$ ) and a cryostream cooler. The collected reflections were corrected for absorption (SADABS). Crystal structural solution (direct method) and refinement (by full-matrix least squares on F) was performed using the OLEX 2 analysis package. All non-hydrogen atoms were refined with anisotropic thermal parameters. Hydrogen atoms were generated in idealized positions, riding on the carrier atoms, with isotropic thermal parameters.

### Crystallographic data and structure refinement for complexes **1** & **2**

|                                             | <b>2 [1], 3 CH<sub>3</sub>OH</b>                                               | <b>[2], C<sub>6</sub>H<sub>6</sub></b>             |
|---------------------------------------------|--------------------------------------------------------------------------------|----------------------------------------------------|
| Empirical formula                           | C <sub>75</sub> H <sub>112</sub> N <sub>8</sub> Ni <sub>2</sub> O <sub>3</sub> | C <sub>78</sub> H <sub>110</sub> N <sub>8</sub> Ni |
| Fw                                          | 1291.15                                                                        | 1218.45                                            |
| Temperature/K                               | 200                                                                            | 200                                                |
| Crystal system                              | monoclinic                                                                     | monoclinic                                         |
| Space group                                 | C2/c                                                                           | P2 <sub>1</sub> /n                                 |
| a/Å                                         | 32.632(7)                                                                      | 13.686(3)                                          |
| b/Å                                         | 8.9933(18)                                                                     | 23.219(5)                                          |
| c/Å                                         | 24.821(5)                                                                      | 23.157(5)                                          |
| $\alpha$ /°                                 | 90.00                                                                          | 90.00                                              |
| $\beta$ /°                                  | 94.39(3)                                                                       | 96.26(3)                                           |
| $\gamma$ /°                                 | 90.00                                                                          | 90.00                                              |
| Volume/Å <sup>3</sup>                       | 7263(3)                                                                        | 7315(3)                                            |
| Z                                           | 4                                                                              | 4                                                  |
| $\rho_{\text{calc}}$ /mg/mm <sup>3</sup>    | 1.181                                                                          | 1.106                                              |
| $m$ /mm <sup>-1</sup>                       | 0.569                                                                          | 0.311                                              |
| F(000)                                      | 2792.0                                                                         | 2648.0                                             |
| Crystal size/mm <sup>3</sup>                | 0.55 × 0.46 × 0.16                                                             | 0.55 × 0.46 × 0.16                                 |
| 2 $\theta$ range for data collection        | 4.7 to 52°                                                                     | 2.5 to 52°                                         |
| Index ranges                                | -40 ≤ h ≤ 36, -11 ≤ k ≤ 9,<br>-30 ≤ l ≤ 27                                     | -16 ≤ h ≤ 14, -28 ≤ k ≤ 28,<br>-28 ≤ l ≤ 28        |
| Reflections collected                       | 32177                                                                          | 63601                                              |
| Independent reflections                     | 7082[R(int) = 0.0671]                                                          | 14101[R(int) = 0.0684]                             |
| Data/restraints/parameters                  | 7082/9/453                                                                     | 14101/281/962                                      |
| Goodness-of-fit on F <sup>2</sup>           | 1.100                                                                          | 1.025                                              |
| Final R indexes [ $I \geq 2\sigma(I)$ ]     | R <sub>1</sub> = 0.0572, wR <sub>2</sub> = 0.1228                              | R <sub>1</sub> = 0.0551, wR <sub>2</sub> = 0.1194  |
| Final R indexes [all data]                  | R <sub>1</sub> = 0.0889, wR <sub>2</sub> = 0.1346                              | R <sub>1</sub> = 0.1415, wR <sub>2</sub> = 0.1466  |
| Largest diff. peak/hole / e Å <sup>-3</sup> | 0.48/-0.54                                                                     | 0.41/-0.28                                         |

Crystallographic data (excluding structure factors) for the structures reported in this paper have been deposited with the Cambridge Crystallographic Data Centre as supplementary publication no. CCDC-927235 and 927236 (for **1** and **2**, respectively). Copies of the data can be obtained

free of charge on application to CCDC, 12 Union Road, Cambridge CB21EZ, UK (fax: (+44)1223-336-033) or via <http://www.ccdc.cam.ac.uk/conts/retrieving.html>.

## Synthesis of the ligand H<sub>4</sub>L and complexes 1 & 2

**General comment:** The ligand H<sub>4</sub>L was prepared in two steps starting from 3,5-di-*tert*-butyl-2-nitrobromobenzene **3** (Scheme 1). A reliable procedure recently reported by the Beifuss' group<sup>2</sup> allowed the Pd-catalyzed *N*-arylation of **3** with 4,5-dimethyl-*o*-phenylenediamine. The adjusted conditions led to the isolation of the *N,N'*-bis(3,5-di-*tert*-butyl-2-nitrophenyl)-4,5-dimethyl-*o*-phenylenediamine **4** in a convenient yield. Subsequent reduction of **4** by catalytic hydrogenation and recrystallization from methanol cleanly led to the targeted ligand H<sub>4</sub>L in a moderate yield.

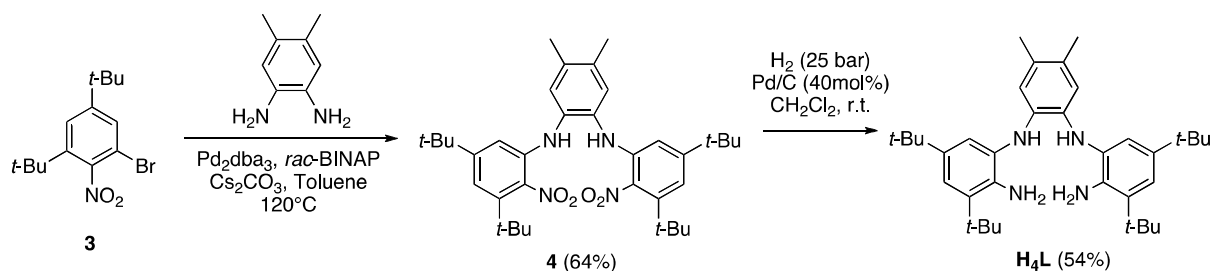

Scheme 1

The reaction between H<sub>4</sub>L and Ni(OAc)<sub>2</sub> in the presence of an excess of Et<sub>3</sub>N was performed in either anhydrous MeOH or anhydrous CH<sub>3</sub>CN (Scheme 2). While the nature of the solvents has no influence on the outcome of the reaction, the concentration revealed to be a decisive parameter. Indeed, at low concentration, only complex [NiL]<sup>0</sup> **1** was isolated whereas [NiH<sub>2</sub>L<sub>2</sub>]<sup>0</sup> **2** preferentially formed at high concentration.

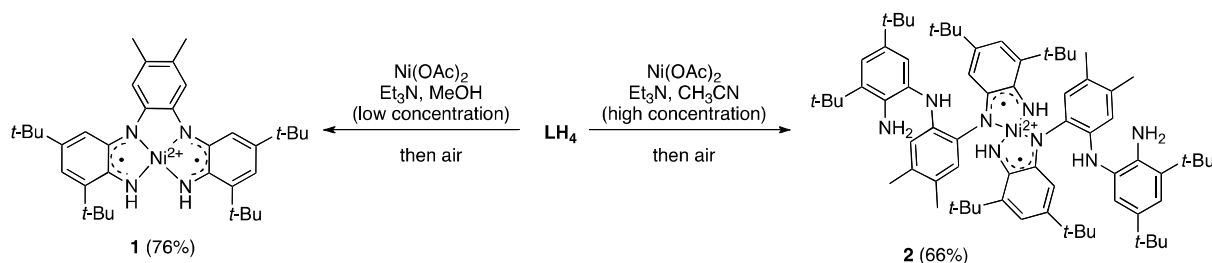

Scheme 2

### Synthetic procedures:

***N,N'*-bis(3,5-di-*tert*-butyl-2-nitrophenyl)-4,5-dimethyl-*o*-phenylenediamine (4).** In a flame-dried resealable tube under argon atmosphere were added compound **3** (2.77g, 8.82 mmol, 2.4 equiv.), 4,5-dimethyl-*o*-phenylenediamine (500 mg, 3.68 mmol, 1.0 equiv.), Cs<sub>2</sub>CO<sub>3</sub> (4.78 g, 14.67 mmol, 4.0 equiv.) and freshly distilled toluene (31 mL). After degassing the solution, Pd<sub>2</sub>dba<sub>3</sub> (336 mg, 0.37 mmol, 10 mol%) and *rac*-Binap (343 mg, 0.55 mmol, 15 mol%) were added. The tube was immediately sealed and heated to 120°C during 24 hours. After cooling to r.t. the mixture was filtrated through a pad of Celite and abundantly washed with CH<sub>2</sub>Cl<sub>2</sub> until getting a colorless filtrate. The organic phase was concentrated under reduced pressure and the remaining crude product was purified by column chromatography on silica gel (CH<sub>2</sub>Cl<sub>2</sub>/Pentane; 3:1 to 1:1, v:v) to give an orange solid (1.41 g, 64% yield). Pure analytical sample was obtained by crystallization from methanol; m.p. 200-203°C (Decomp., MeOH); <sup>1</sup>H NMR (400MHz, CDCl<sub>3</sub>) : δ (ppm)= 7.05 (d, *J*= 1.8Hz, 2H), 6.93 (s, 2H), 6.86 (d, *J*= 1.8Hz, 2H), 5.80 (sl, 2H), 2.18 (s, 6H), 1.39 (s, 18H), 1.21 (s, 18H). <sup>13</sup>C NMR (100MHz, CDCl<sub>3</sub>): δ (ppm)= 153.2, 142.1, 140.3, 136.3, 132.5, 131.5, 123.4, 117.4, 113.3, 36.2, 35.1, 31.1, 31.0, 19.3. MS (ESI): *m/z*= 601 [M-H]<sup>-</sup>. IR: ν (cm<sup>-1</sup>) 3390, 2962, 2870, 1580, 1530. Anal. Calcd for C<sub>36</sub>H<sub>50</sub>N<sub>4</sub>O<sub>4</sub>: C, 71.73; H, 8.36; N, 9.29. Found: C, 71.60; H, 8.36; N, 9.17.

***N,N'*-bis(3,5-di-*tert*-butyl-2-aminophenyl)-4,5-dimethyl-*o*-phenylenediamine (H<sub>4</sub>L).** In a Paar pressure vessel, Pd/C (40 mol%) was added to a solution of the dinitro compound (0.03 M) in a CH<sub>2</sub>Cl<sub>2</sub>/MeOH mixture (1:1, v:v). The resulting suspension was stirred at r.t. under H<sub>2</sub> (25 bars) during 24 hours. After complete consumption of the material (TLC monitoring) the mixture was filtrated through celite and abundantly washed with CH<sub>2</sub>Cl<sub>2</sub>. The combined organic phase was dried over Na<sub>2</sub>SO<sub>4</sub> and concentrated under reduced pressure. The remaining residue was recrystallized from MeOH to afford white crystals. Yield: 54%; m.p. 211-213°C (MeOH); <sup>1</sup>H NMR (400 MHz, CD<sub>3</sub>OD): δ (ppm)= 7.02 (d, *J*= 2.3 Hz, 2H), 6.81 (d, *J*= 2.3 Hz, 2H), 6.52 (s, 2H), 2.12 (s, 6H), 1.43 (s, 18H), 1.21 (s, 18H). <sup>13</sup>C NMR (100 MHz, CDCl<sub>3</sub>): δ (ppm)= 141.1, 135.5, 134.3, 132.8, 131.3, 129.6, 119.8, 118.5, 116.9, 34.9, 34.5, 31.8, 30.2, 19.3. MS (ESI): *m/z*= 543 [M+H]<sup>+</sup>. IR: ν (cm<sup>-1</sup>) 3481, 3348, 2950, 2867, 1580, 1514. Anal. Calcd for C<sub>36</sub>H<sub>54</sub>N<sub>4</sub>, 0.5 MeOH: C, 78.44; H, 10.10; N, 10.03. Found: C, 78.15; H, 10.07; N, 9.92.

**[NiL]<sup>0</sup> (1).** Under argon, the ligand H<sub>4</sub>L (50mg, 0.09 mmol, 1.0 equiv.) and Et<sub>3</sub>N (103 μL, 0.74 mmol, 8.0 eq) were added to a degassed solution of Ni(OAc)<sub>2</sub>·4H<sub>2</sub>O (23 mg, 0.09 mmol, 1.0 equiv.) in dry MeOH (30 mL). The mixture was refluxed during 1 hour under argon, then exposed to air upon cooling to r.t. and stirred 2 hours. The black precipitate that formed was

filtrated, washed with MeOH and dried under vacuum; yield: 76%. Suitable crystals for X-ray analysis were obtained by slow evaporation at r.t. of an Et<sub>2</sub>O/MeOH solution; m.p. >250°C; MS (ESI): m/z= 597 [M+H]<sup>+</sup>. IR:  $\nu$  (cm<sup>-1</sup>) 3414, 2949, 2905, 2870, 1477, 1356, 1106. Anal. Calcd for C<sub>36</sub>H<sub>50</sub>N<sub>4</sub>Ni, 0.5MeOH, 0.5CH<sub>2</sub>Cl<sub>2</sub>: C, 67.74; H, 8.14; N, 8.54. Found: C, 68.04; H, 8.00; N, 8.61.

**[NiH<sub>2</sub>L<sub>2</sub>]<sup>0</sup> (2).** Under argon, Ni(OAc)<sub>2</sub>·4H<sub>2</sub>O (32 mg, 0.13 mmol, 1.0 equiv.) and Et<sub>3</sub>N (72  $\mu$ L, 0.52 mmol, 4.0 eq) were added to a degassed solution of ligand **3** (70mg, 0.13 mmol, 1.0 equiv.) in dry CH<sub>3</sub>CN (5 mL). The mixture was refluxed during 1 hour under argon, then exposed to air upon cooling to r.t. and stirred 2 hours. The blue green precipitate that formed was filtrated, washed with CH<sub>3</sub>CN and dried under vacuum; yield: 66%. Suitable crystals for X-ray analysis were obtained by vapor diffusion of CH<sub>3</sub>CN in a benzene solution at r.t.; m.p. >250°C; MS (ESI): m/z= 1140 [M+H]<sup>+</sup>. IR:  $\nu$  (cm<sup>-1</sup>) 3481, 3383, 3348, 2952, 2908, 2870, 1584, 1309, 1236, 1163, 1106. Anal. Calcd for C<sub>72</sub>H<sub>104</sub>N<sub>8</sub>Ni, C<sub>6</sub>H<sub>6</sub>: C, 76.89; H, 9.10; N, 9.20. Found: C, 76.56; H, 9.14; N, 9.19.

## Electrochemical experiments

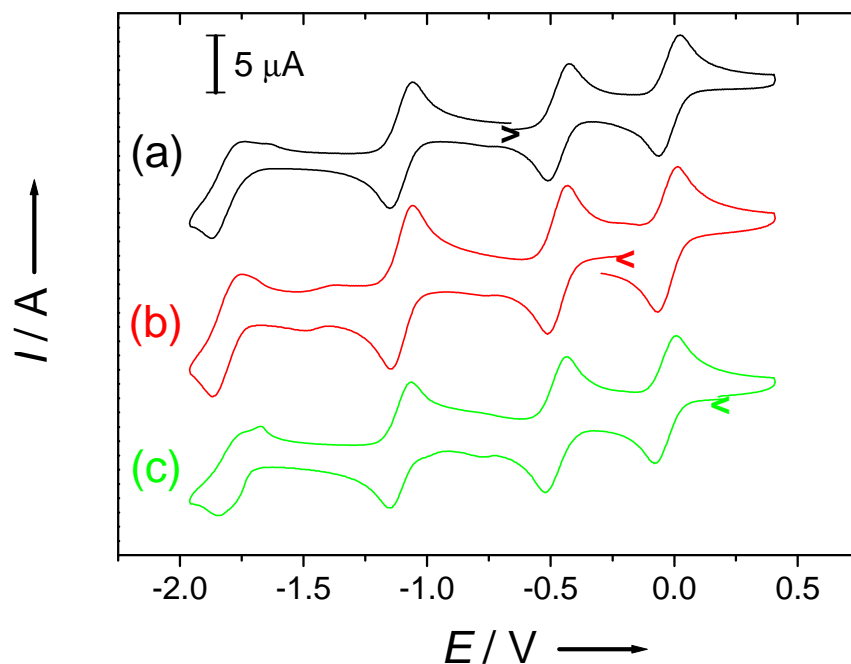

**Figure S1** Cyclic voltammograms of 0.5 mM  $\text{CH}_2\text{Cl}_2$  (+0.1 M TBAP) solutions of (a) **1**; (b) electrochemically generated  $1^+$ ; (c) electrochemically generated  $1^{2+}$ . Scan rate = 0.1 V / s.  $T = 298$  K. The potentials are referenced vs.  $\text{Fc}/\text{Fc}^+$ .

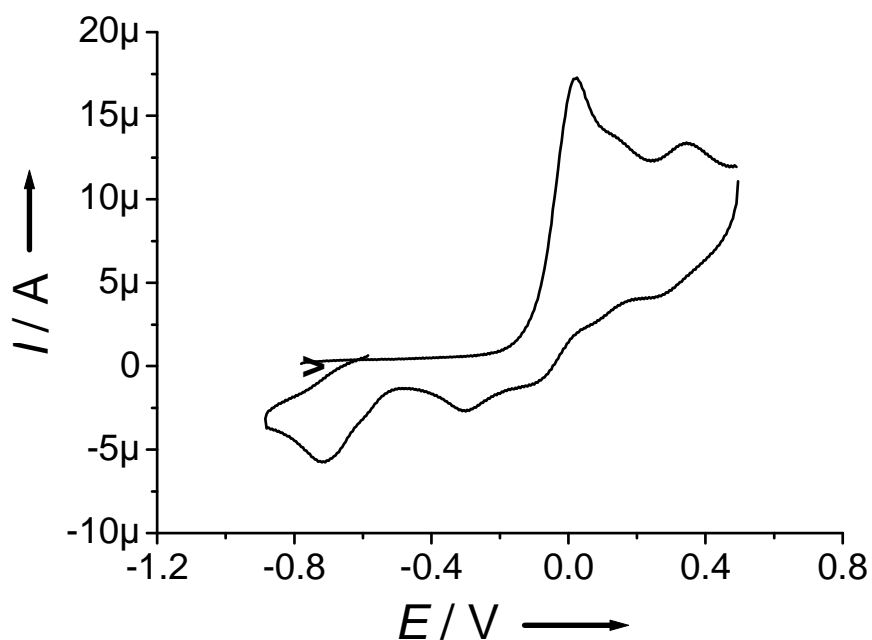

**Figure S2** Cyclic voltammogram of a 0.5 mM  $\text{CH}_2\text{Cl}_2$  (+0.1 M TBAP) solution of  $\text{H}_4\text{L}$ . Scan rate = 0.1 V / s.  $T = 298$  K. The potentials are referenced vs.  $\text{Fc}/\text{Fc}^+$ .

## EPR and UV-Vis spectra

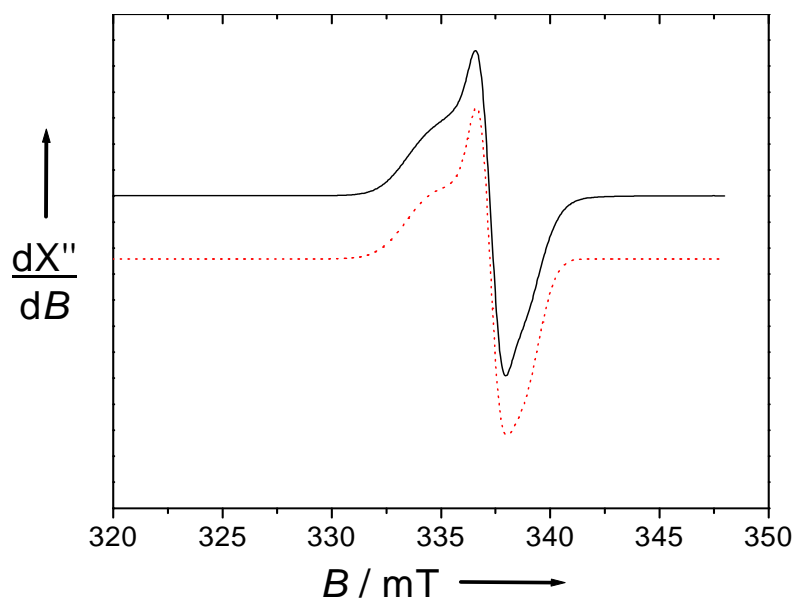

**Figure S3 X-Band EPR spectrum** of a 0.5 mM  $\text{CH}_2\text{Cl}_2$  (+ 0.1 M TBAP) of the electrochemically generated  $1^+$ . Black: Experimental spectrum; Red: Simulation using the parameters  $g_1 = 1.994$ ,  $g_2 = 2.004$ ,  $g_3 = 2.021$ . Microwave Freq: 9.42 GHz, power: 5 mW, Mod. Freq: 100 KHz, Amp. 0.1 mT,  $T = 10$  K.

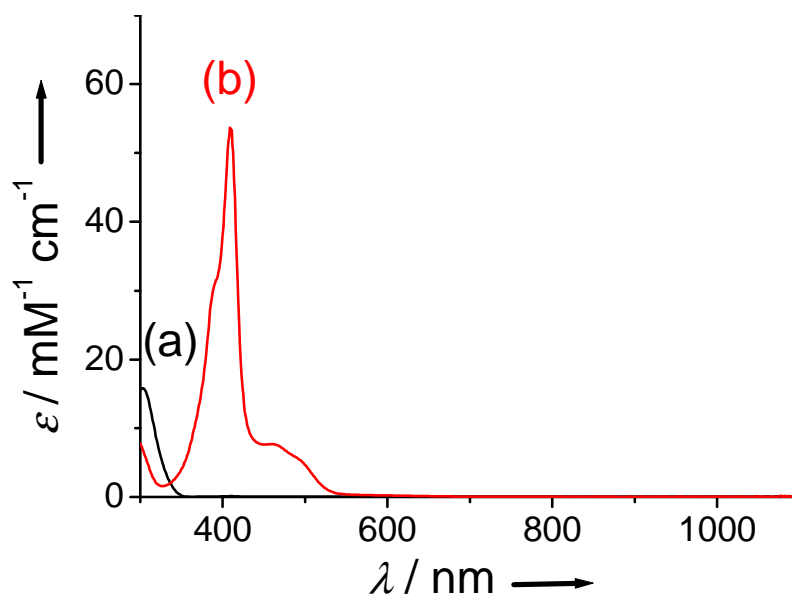

**Figure S4 UV-Vis spectra** of  $\text{H}_4\text{L}$  in  $\text{CH}_2\text{Cl}_2$  solution (+ 0.1 M TBAP). Black (a):  $\text{H}_4\text{L}$  before electrolysis, Red (b): After electrochemical oxidation at 0.21 V.  $T = 298$  K.



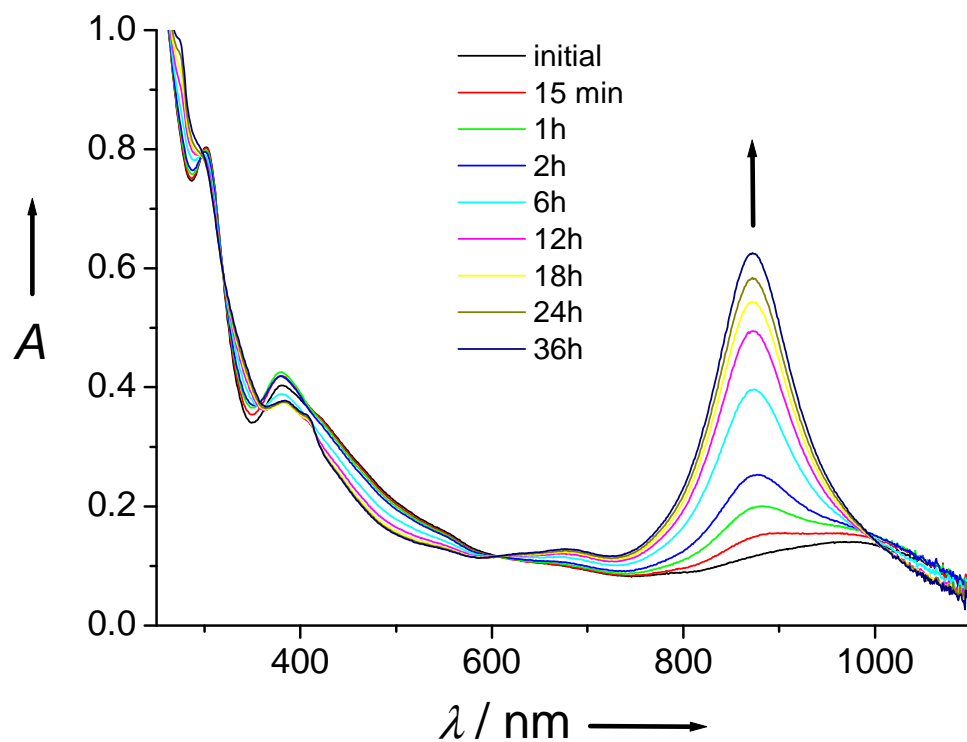

**Figure S5 Evolution of the UV-Vis spectra of 1** after addition of one molar equivalent of H<sub>4</sub>L in CH<sub>2</sub>Cl<sub>2</sub> solution (+ 0.1 M TBAP). *T* = 298 K.

## NMR Spectra

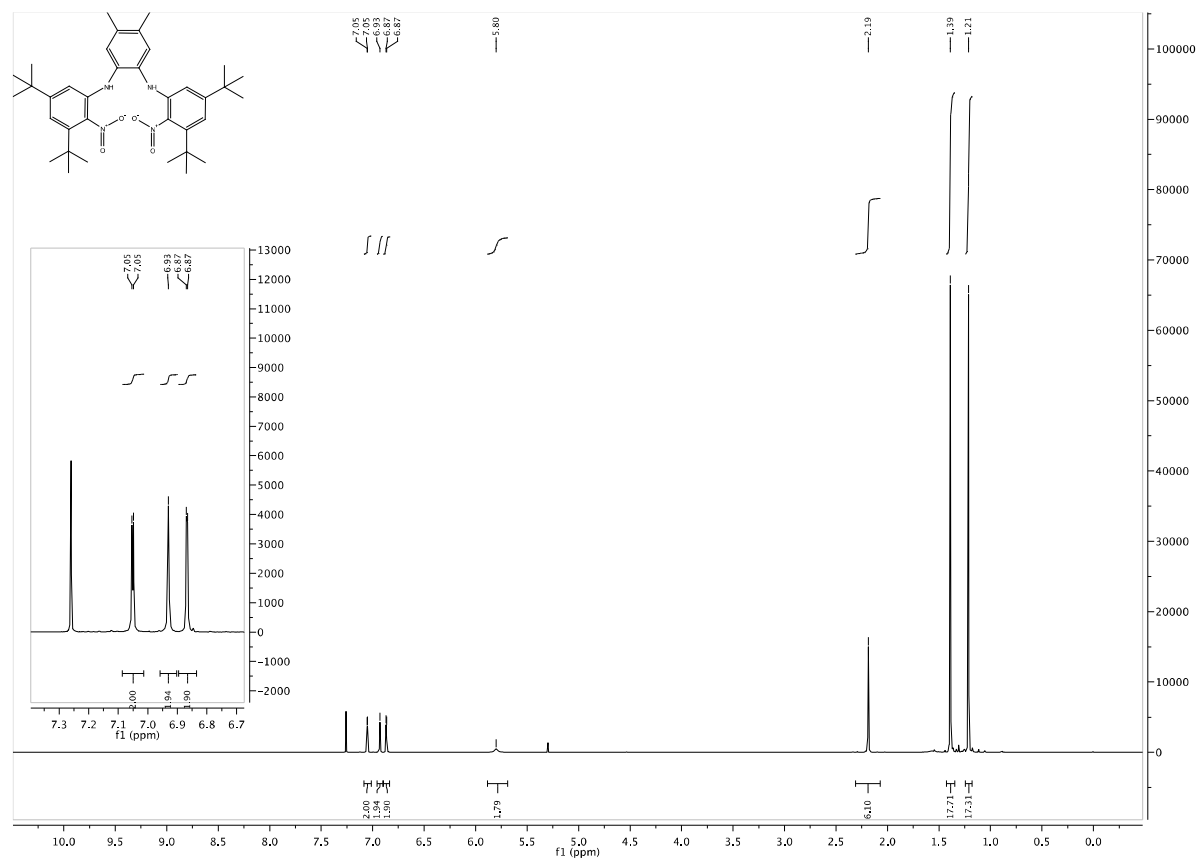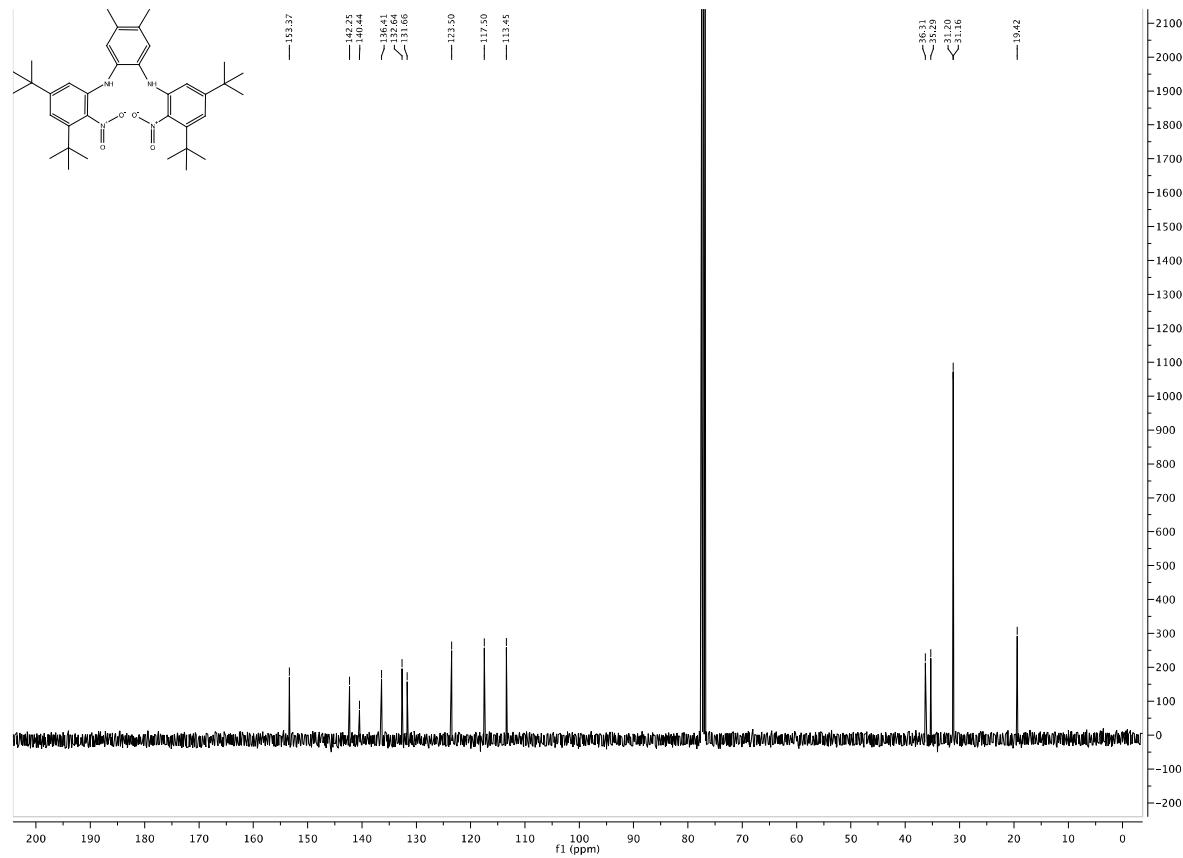

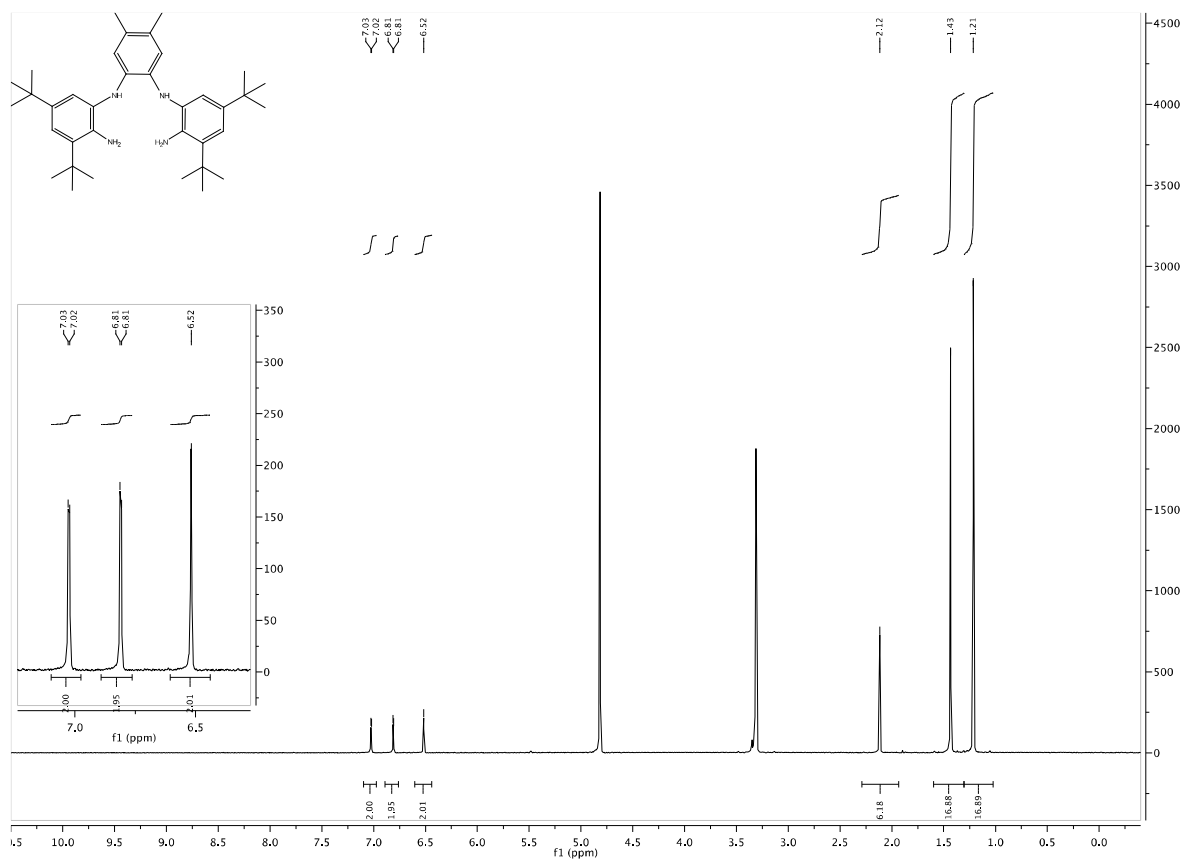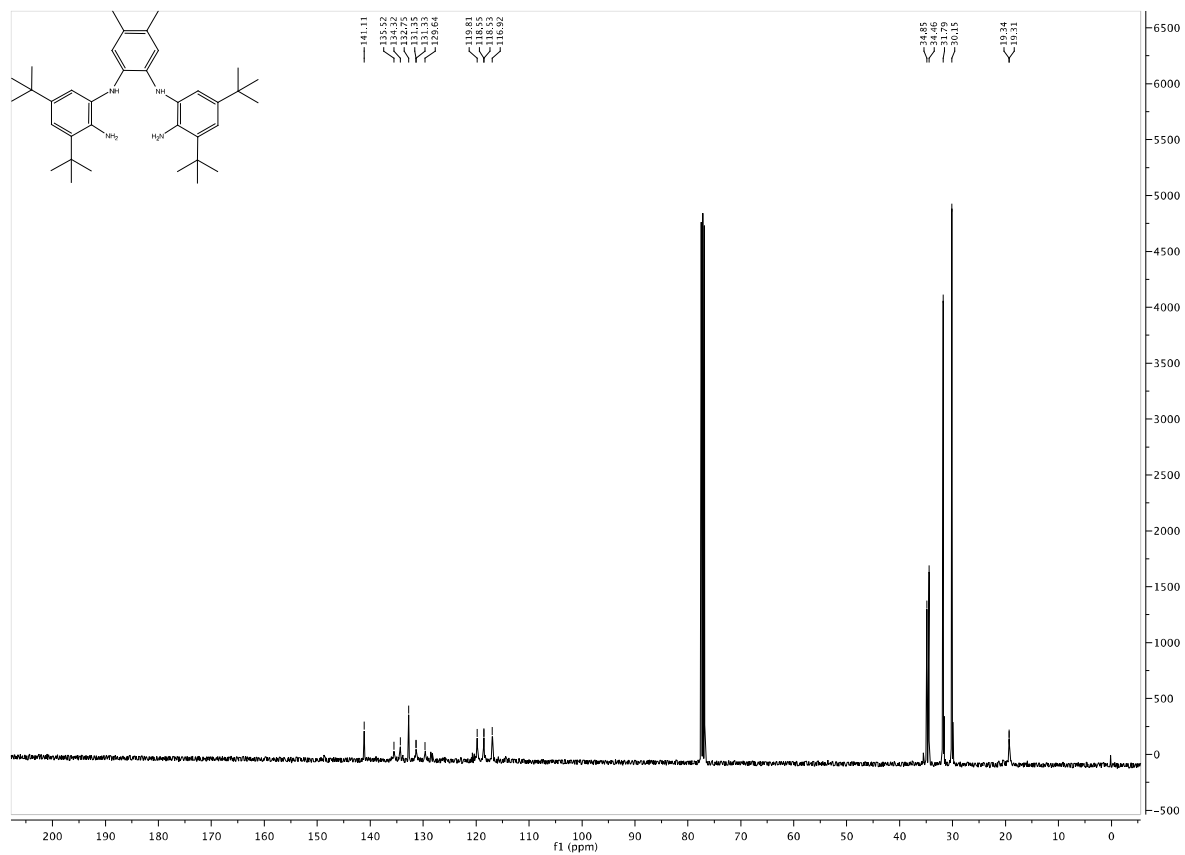

## References

1 Rundel, W. *Chem. Ber.* **1963**, *96*, 636-637.

2 Tietze, M.; Iglesias, A.; Merisor, E.; Conrad, J.; Klaiber, I.; Beifuss, U. *Org. Lett.* **2005**, *7*, 1549-1552.
